# Supplementary material for: MGA Mutation as a Novel Biomarker for Immune Checkpoint Therapies in Non-Squamous Non-Small Cell Lung Cancer
Source: PubMed Central journal article supplement (PMC8076956; doi:10.3389/fphar.2021.625593), 2021-04-13

Table S 1. Patient characteristics of the discovery cohort

|                                 | <b>Overall<br/>(N=314)</b> |
|---------------------------------|----------------------------|
| <b>Age</b>                      |                            |
| Median [Min, Max]               | 64.0 [22.0, 92.0]          |
| Missing                         | 13 (4.1%)                  |
| <b>SEX</b>                      |                            |
| Male                            | 135 (43.0%)                |
| Female                          | 179 (57.0%)                |
| <b>SMOKING</b>                  |                            |
| Ever                            | 248 (79.0%)                |
| Never                           | 66 (21.0%)                 |
| <b>TREATMENT_TYPE</b>           |                            |
| Monotherapy                     | 224 (71.3%)                |
| Combination                     | 90 (28.7%)                 |
| <b>TMB</b>                      |                            |
| Mean (SD)                       | 9.12 (10.1)                |
| Median [Min, Max]               | 5.70 [0.184, 91.8]         |
| <b>PDL1</b>                     |                            |
| ≥1%                             | 70 (22.3%)                 |
| 0%                              | 59 (18.8%)                 |
| Missing                         | 185 (58.9%)                |
| <b>RECIST</b>                   |                            |
| CR                              | 8 (2.5%)                   |
| PR                              | 69 (22.0%)                 |
| SD                              | 108 (34.4%)                |
| PD                              | 126 (40.1%)                |
| NE                              | 3 (1.0%)                   |
| <b>DURABLE_CLINICAL_BENEFIT</b> |                            |
| YES                             | 113 (36.0%)                |
| NO                              | 181 (57.6%)                |
| NE                              | 20 (6.4%)                  |

Abbreviations: TMB, Tumor mutational burden; PD-L1, Programmed cell death ligand-1; CR, Complete response; PR, partial response; SD, stable disease; PD, progression of disease.

Table S2. Identified oncogenes and tumor suppressor genes (n=82)

| Gene<br>Symbol | Mutation Number<br>with DCB | Mutation Number<br>with NCB | Total Mutation Number |
|----------------|-----------------------------|-----------------------------|-----------------------|
| ALK            | 7                           | 8                           | 15                    |
| APC            | 9                           | 10                          | 19                    |
| ARID1A         | 11                          | 12                          | 23                    |
| ARID1B         | 8                           | 4                           | 12                    |
| ARID2          | 10                          | 8                           | 18                    |
| ASXL2          | 8                           | 3                           | 11                    |
| ATM            | 12                          | 13                          | 25                    |
| ATR            | 6                           | 4                           | 10                    |
| ATRX           | 12                          | 7                           | 19                    |
| BARD1          | 6                           | 4                           | 10                    |
| BCOR           | 10                          | 5                           | 15                    |
| BRAF           | 6                           | 6                           | 12                    |
| BRCA1          | 6                           | 6                           | 12                    |
| BRCA2          | 9                           | 2                           | 11                    |
| BRIP1          | 7                           | 7                           | 14                    |
| CARD11         | 6                           | 6                           | 12                    |
| CDKN2A         | 8                           | 10                          | 18                    |
| CREBBP         | 10                          | 9                           | 19                    |
| CTNNB1         | 2                           | 9                           | 11                    |
| DDR2           | 8                           | 3                           | 11                    |
| DOT1L          | 8                           | 4                           | 12                    |
| EGFR           | 10                          | 31                          | 41                    |
| EP300          | 4                           | 7                           | 11                    |
| EPHA3          | 14                          | 13                          | 27                    |
| EPHA5          | 16                          | 8                           | 24                    |
| EPHA7          | 8                           | 8                           | 16                    |
| ERBB2          | 5                           | 9                           | 14                    |
| ERBB4          | 13                          | 5                           | 18                    |
| FAT1           | 19                          | 9                           | 28                    |
| FLT1           | 9                           | 7                           | 16                    |
| FLT4           | 10                          | 5                           | 15                    |
| GNAS           | 3                           | 7                           | 10                    |
| GRIN2A         | 10                          | 8                           | 18                    |
| HGF            | 10                          | 10                          | 20                    |
| INHBA          | 6                           | 5                           | 11                    |
| INPP4B         | 11                          | 5                           | 16                    |
| IRS1           | 5                           | 5                           | 10                    |
| KDM5C          | 9                           | 2                           | 11                    |
| KDR            | 7                           | 4                           | 11                    |

|         |    |    |     |
|---------|----|----|-----|
| KEAP1   | 25 | 38 | 63  |
| KMT2A   | 10 | 3  | 13  |
| KMT2C   | 22 | 14 | 36  |
| KMT2D   | 12 | 14 | 26  |
| KRAS    | 49 | 67 | 116 |
| LATS2   | 6  | 4  | 10  |
| MDC1    | 6  | 7  | 13  |
| MED12   | 8  | 6  | 14  |
| MET     | 8  | 9  | 17  |
| MGA     | 17 | 6  | 23  |
| NCOR1   | 8  | 5  | 13  |
| NF1     | 12 | 14 | 26  |
| NF2     | 6  | 4  | 10  |
| NOTCH1  | 7  | 3  | 10  |
| NOTCH2  | 8  | 4  | 12  |
| NOTCH4  | 9  | 11 | 20  |
| NSD1    | 4  | 6  | 10  |
| NTRK3   | 9  | 7  | 16  |
| PBRM1   | 3  | 9  | 12  |
| PDGFRA  | 4  | 7  | 11  |
| PGR     | 10 | 4  | 14  |
| PIK3C2G | 6  | 4  | 10  |
| PIK3CA  | 7  | 11 | 18  |
| PIK3CG  | 10 | 9  | 19  |
| PTPRD   | 23 | 17 | 40  |
| PTPRT   | 20 | 13 | 33  |
| RB1     | 10 | 10 | 20  |
| RBM10   | 12 | 20 | 32  |
| RET     | 9  | 4  | 13  |
| SETD2   | 10 | 8  | 18  |
| SF3B1   | 6  | 5  | 11  |
| SMAD4   | 3  | 11 | 14  |
| SMARC4  | 19 | 19 | 38  |
| SMO     | 9  | 4  | 13  |
| STK11   | 17 | 50 | 67  |
| TBX3    | 5  | 9  | 14  |
| TET1    | 11 | 2  | 13  |
| TET2    | 6  | 8  | 14  |
| TP53    | 67 | 89 | 156 |
| TP63    | 6  | 4  | 10  |
| TSC2    | 7  | 3  | 10  |
| TSHR    | 7  | 3  | 10  |
| ZFHX3   | 8  | 7  | 15  |

---

**Table S3. Clinical cohorts analyzed in this study**

| <b>Cohort</b>                            | <b>Matthew D Hellmann</b>               | <b>Hira Rizvi</b>                                   | <b>Diana Miao</b>      | <b>Naiyer A. Rizvi</b> | <b>Robert M Samstein</b>                            |
|------------------------------------------|-----------------------------------------|-----------------------------------------------------|------------------------|------------------------|-----------------------------------------------------|
| <b>Journal</b>                           | Cancer Cell                             | Journal of Clinical Oncology                        | Nature Genetics        | Science                | Nature Genetics                                     |
| <b>Year</b>                              | 2018                                    | 2018                                                | 2018                   | 2015                   | 2019                                                |
| <b>Regimen</b>                           | Combination (PD-1 plus CTLA-4 blockade) | Anti-PD-1/PD-L1, or combined with anti-CTLA-4       |                        | Anti-PD-1              | Anti-PD-1/PD-L1, or combined with anti-CTLA-4       |
| <b>Cancer type</b>                       | NSCLC                                   | NSCLC                                               | Pan-cancer             | NSCLC                  | Pan-cancer                                          |
| <b>No. of nonsquamous NSCLC patients</b> | 59                                      | 206                                                 | 29                     | 30                     | 305                                                 |
| <b>Outcome</b>                           | ORR, PFS                                | ORR, PFS                                            | ORR, PFS               | ORR, PFS               | OS                                                  |
| <b>NGS testing</b>                       | Whole-exome sequencing                  | MSK-IMPACT gene panel: 468genes;410 genes;341 genes | Whole-exome sequencing | Whole-exome sequencing | MSK-IMPACT gene panel: 468genes;410 genes;341 genes |

Table S 4 . Baseline characteristics according to MGA mutation status

|                        | MGA wild type<br>(N=242) | MGA mutated type<br>(N=24) | p-value |                     |
|------------------------|--------------------------|----------------------------|---------|---------------------|
| <b>Age</b> (mean (SD)) | 64.16 (10.80)            | 65.52 (10.47)              | 0.56    | One-way Anova       |
| <b>Sex</b>             |                          |                            | 0.83    | Fisher's exact test |
| Male                   | 101 ( 41.7%)             | 11 ( 45.8%)                |         |                     |
| Female                 | 141 ( 58.3%)             | 13 ( 54.2%)                |         |                     |
| <b>Histology</b>       |                          |                            | 0.67    | Fisher's exact test |
| Adenocarcinoma         | 129 ( 53.3%)             | 14 ( 58.3%)                |         |                     |
| Others                 | 113 ( 46.7%)             | 10 ( 41.7%)                |         |                     |
| <b>Smoking</b>         |                          |                            | 0.79    | Fisher's exact test |
| Ever                   | 193 ( 79.8%)             | 20 ( 83.3%)                |         |                     |
| Never                  | 49 ( 20.2%)              | 4 ( 16.7%)                 |         |                     |
| <b>Treatment type</b>  |                          |                            | 0.24    | Fisher's exact test |
| Monotherapy            | 172 ( 71.1%)             | 14 ( 58.3%)                |         |                     |
| Combination            | 70 ( 28.9%)              | 10 ( 41.7%)                |         |                     |
| <b>TMB</b> (mean (SD)) | 8.18 (8.53)              | 15.79 (12.53)              | <0.001  | Man-Whitney U test  |

## Figure Legends

Fig.S1. Enrichment of gene mutations in patients with CR/PR vs. PD in the discovery cohort (two-tailed Fisher's exact test,  $n = 77$  patients with CR/PR,  $n = 126$  patients with PD). Red dashed line denotes false discovery rate adjusted  $q = 0.05$  (Fisher's exact test).

Fig.S2. Kaplan-Meier curves comparing PFS of patients with or without MGA mutations in the TCGA-LUAD cohort (A) and TCGA-LUAD cohort with stage IV patients (B).

Fig.S3. Lollipop plot shows the distribution of MGA mutations in the ICI-treated cohort and TCGA-LUAD cohort.

Fig.S4. Association of MGA Mutation with DNA damage repair gene mutations in MSKCC ICI-treated cohort (A) and MSKCC non-ICI-treated cohort (B).

Fig.S5. Association of MGA Mutation with relative abundance of infiltrated immune cell by CIBERSORT in the TCGA-LUAD cohort. Gene expression data were uploaded to the CIBERSORTx web portal (<https://cibersortx.stanford.edu/>), with batch correction performed and permutation number setting to 1000 for significance analysis.  $*p < 0.05$  (Mann-Whitney U test).

Fig. S1

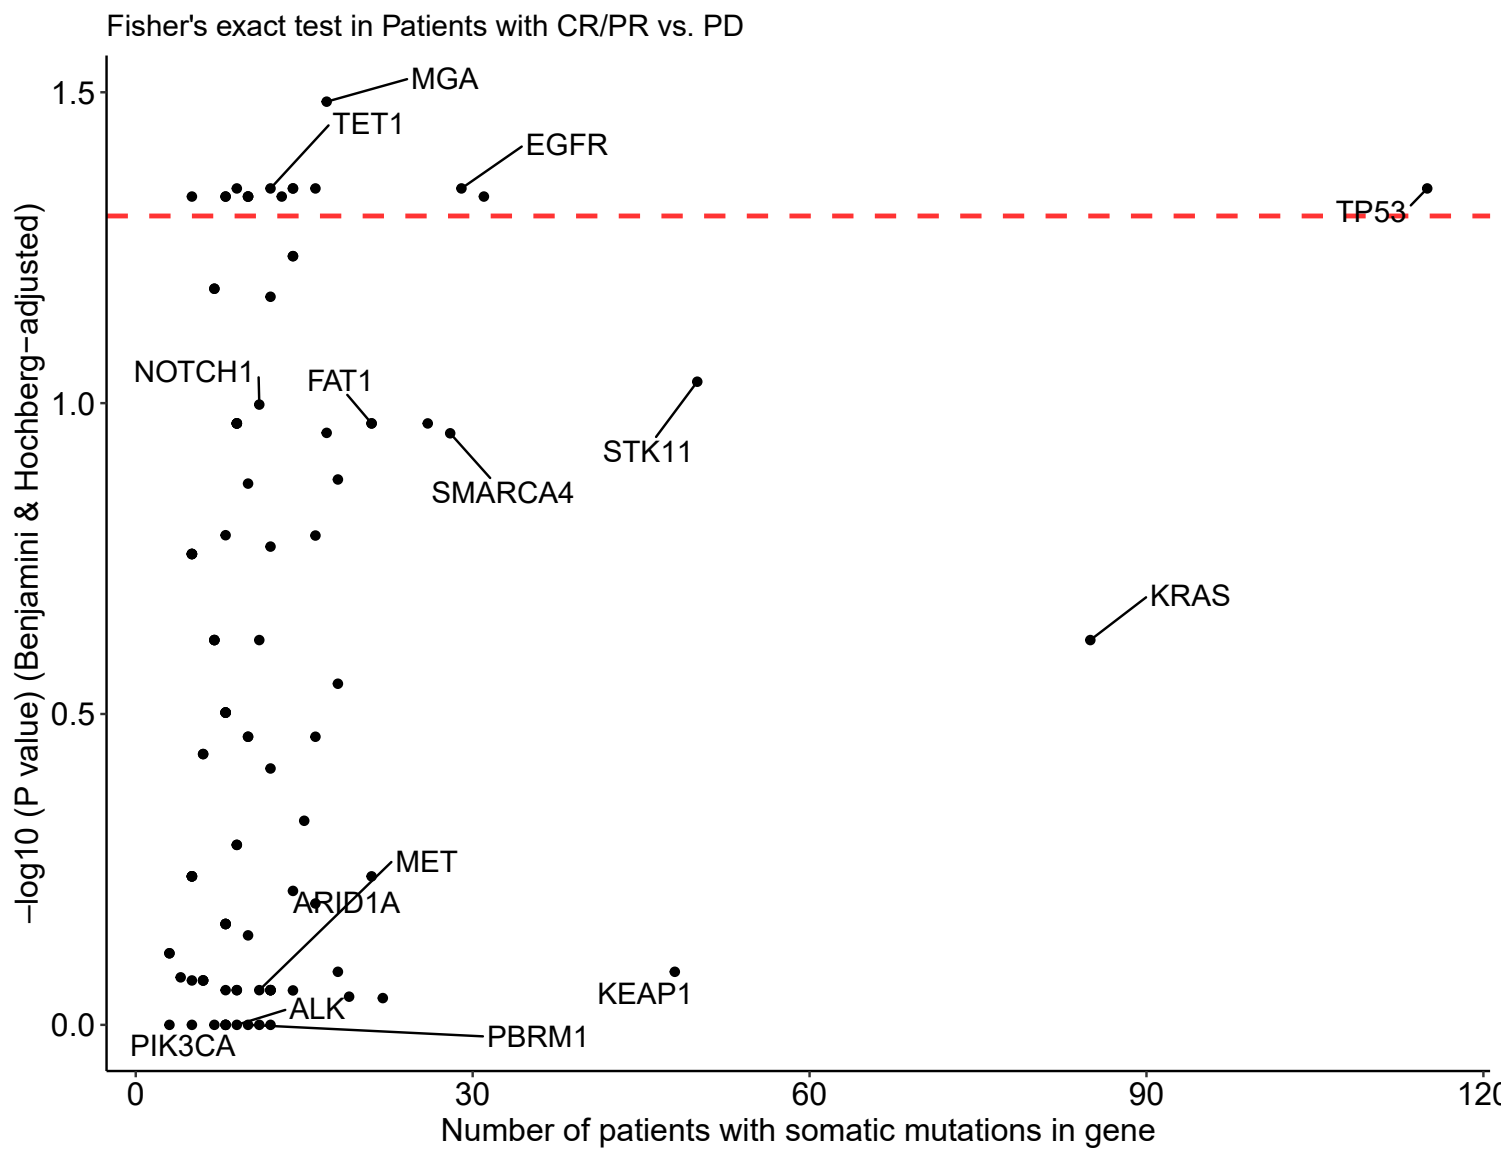

Fig. S2

A

TCGA-LUAD cohort

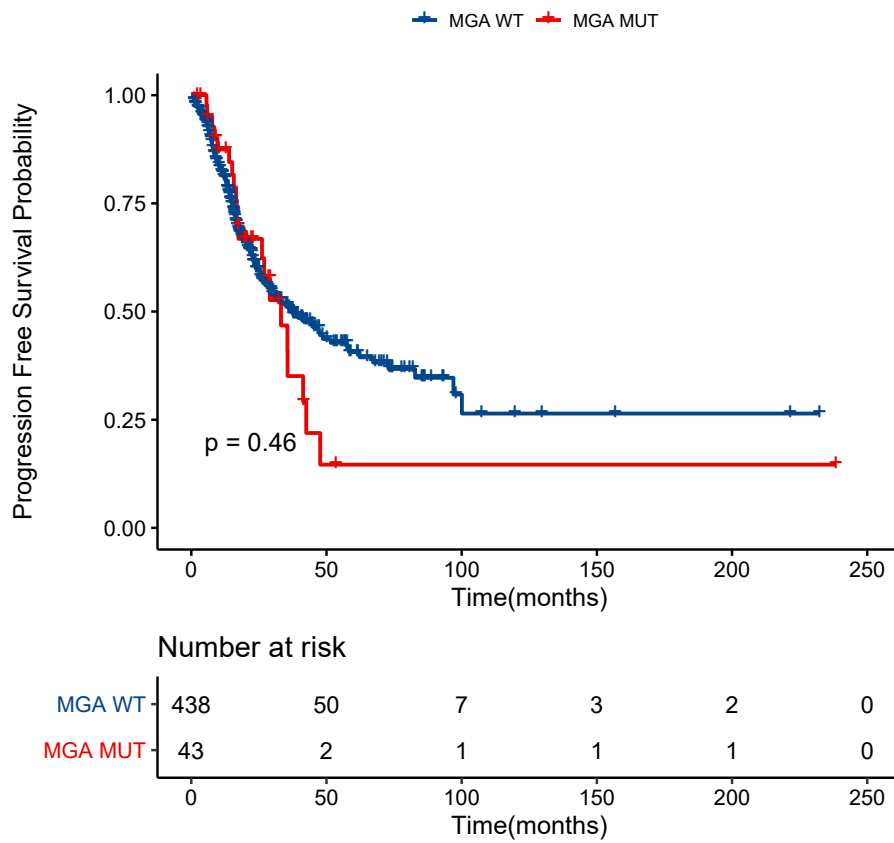

B

TCGA-LUAD cohort (stage IV)

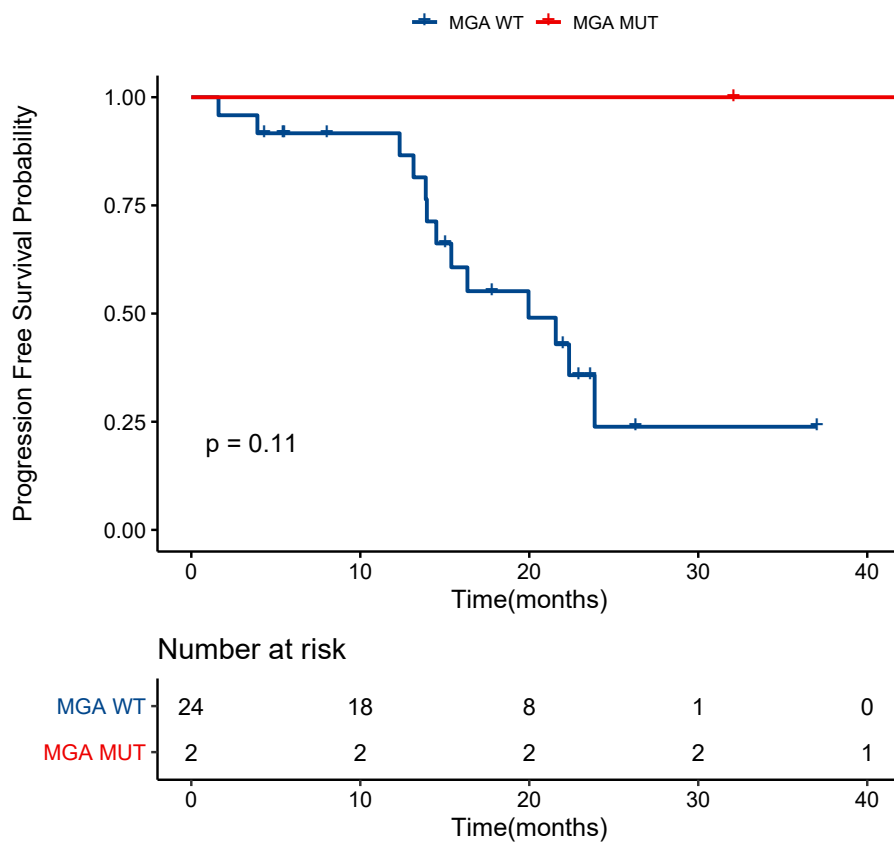



Fig. S3

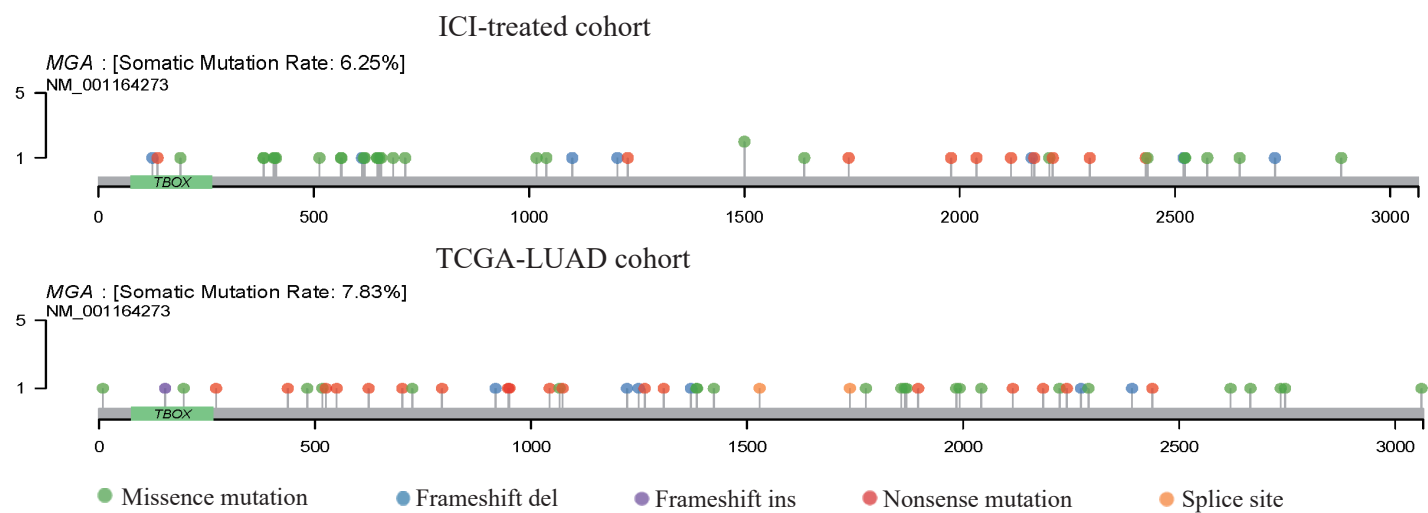

Fig. S4

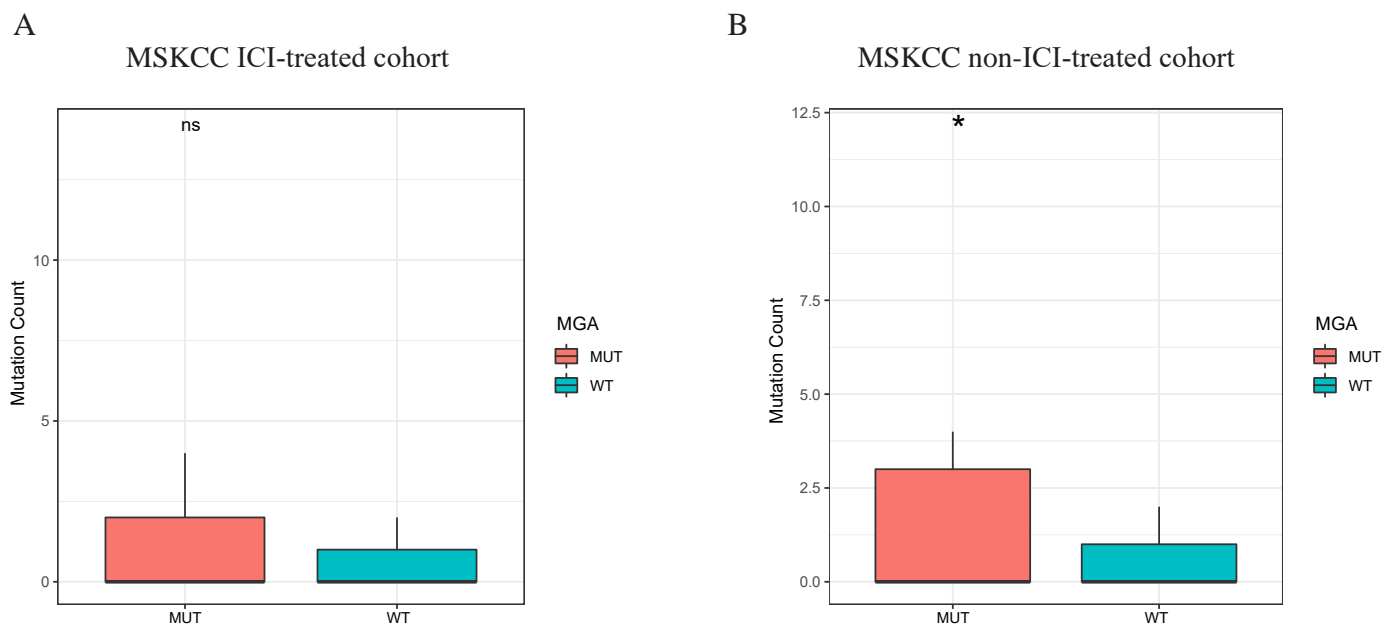

Fig. S5

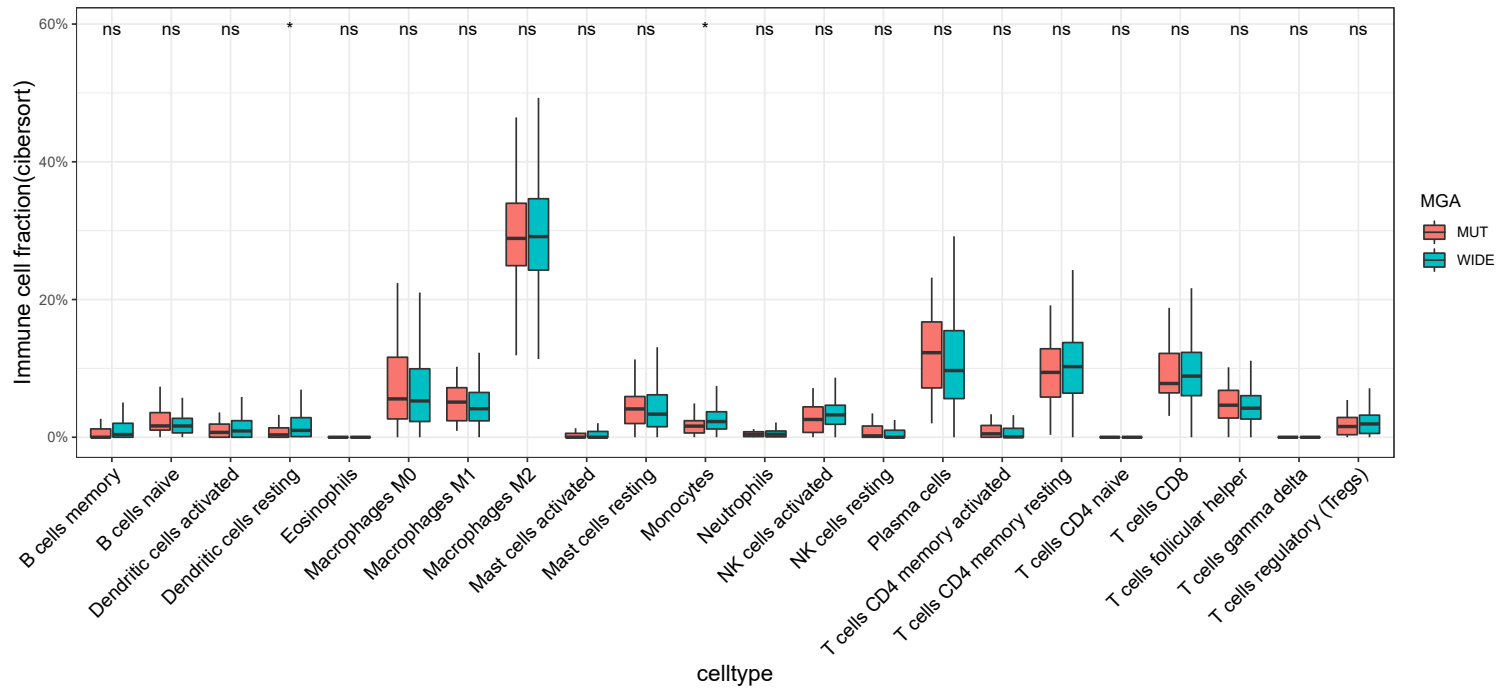

Supplement: datasheet1.pdf [file datasheet1.pdf]
